# Supplementary material for: Flavonoids from Selaginella doederleinii Hieron and Their Antioxidant and Antiproliferative Activities
Source: MDPI journal article supplement (doi:10.3390/antiox11061189), 2022-06-17
Supplement: s1 [file s1]

## Supplementary data

# Flavonoids from *Selaginella doederleinii* Hieron and Their Antioxidant and Antiproliferative Activities

Felix Wambua Muema<sup>1,2,3,4,†</sup>, Ye Liu<sup>1,2,3,†</sup>, Yongli Zhang<sup>1,2,3</sup>, Guilin Chen<sup>1,2,3</sup> and Mingquan Guo<sup>1,2,3,\*</sup>

<sup>1</sup> CAS Key Laboratory of Plant Germplasm Enhancement and Specialty Agriculture, Wuhan Botanical Garden, Chinese Academy of Sciences, Wuhan 430074, China; fwambua83@mailsucas.ac.cn (F.W.M.); liuye@wbgcas.cn (Y.L.); zhangyongli@wbgcas.cn (Y.Z.); glchen@wbgcas.cn.

<sup>2</sup> Sino-Africa Joint Research Center, Chinese Academy of Sciences, Wuhan 430074, China.

<sup>3</sup> Innovation Academy for Drug Discovery and Development, Chinese Academy of Sciences, Shanghai 201203, China.

<sup>4</sup> University of Chinese Academy of Sciences, Beijing 100049, China.

\* Correspondence: guomq@wbgcas.cn; Tel.: +86-027-87700850

† These authors contributed equally to this work

## Supporting data content

**Figure S1.** Isolation flow diagram of compounds **1-16**

**Figure S2.** UPLC-QTOF-MS spectrum of compound **1**

**Figure S3.**  $^1\text{H}$  NMR (600 MHz) spectrum of compound **1** in Methanol- $d_4$

**Figure S4.**  $^{13}\text{C}$  NMR (150 MHz) spectrum of compound **1** in Methanol- $d_4$

**Figure S5.** DEPT (150 MHz) spectrum of compound **1** in Methanol- $d_4$

**Figure S6.** HSQC (600 MHz) spectrum of compound **1** in Methanol- $d_4$

**Figure S7.**  $^1\text{H}$ - $^1\text{H}$  COSY (600 MHz) spectrum of compound **1** in Methanol-  $d_4$

**Figure S8.** HMBC (600 MHz) spectrum of compound **1** in Methanol- $d_4$

**Figure S9.** NOESY (600 MHz) spectrum of compound **1** in Methanol- $d_4$

**Figure S10.** UPLC-QTOF-MS spectrum of compound **3**

**Figure S11.**  $^1\text{H}$  NMR (600 MHz) spectrum of compound **3** in Methanol- $d_4$

**Figure S12.**  $^{13}\text{C}$  NMR (150 MHz) spectrum of compound **3** in Methanol- $d_4$

**Figure S13.** DEPT (150 MHz) spectrum of compound **3** in Methanol- $d_4$

**Figure S14.** HSQC (600 MHz) spectrum of compound **3** in Methanol- $d_4$

**Figure S15.**  $^1\text{H}$ - $^1\text{H}$  COSY (600 MHz) spectrum of compound **3** in Methanol- $d_4$

**Figure S16.** HMBC (600 MHz) spectrum of compound **3** in Methanol- $d_4$

**Figure S17.** NOESY (600 MHz) spectrum of compound **3** in Methanol- $d_4$

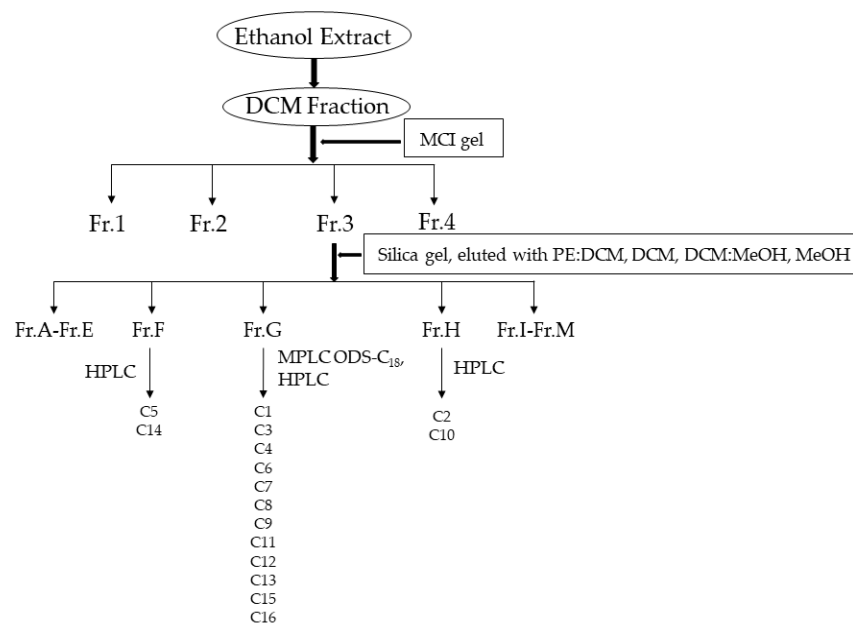

**Figure S1.** Isolation flow diagram of compounds **1-16**

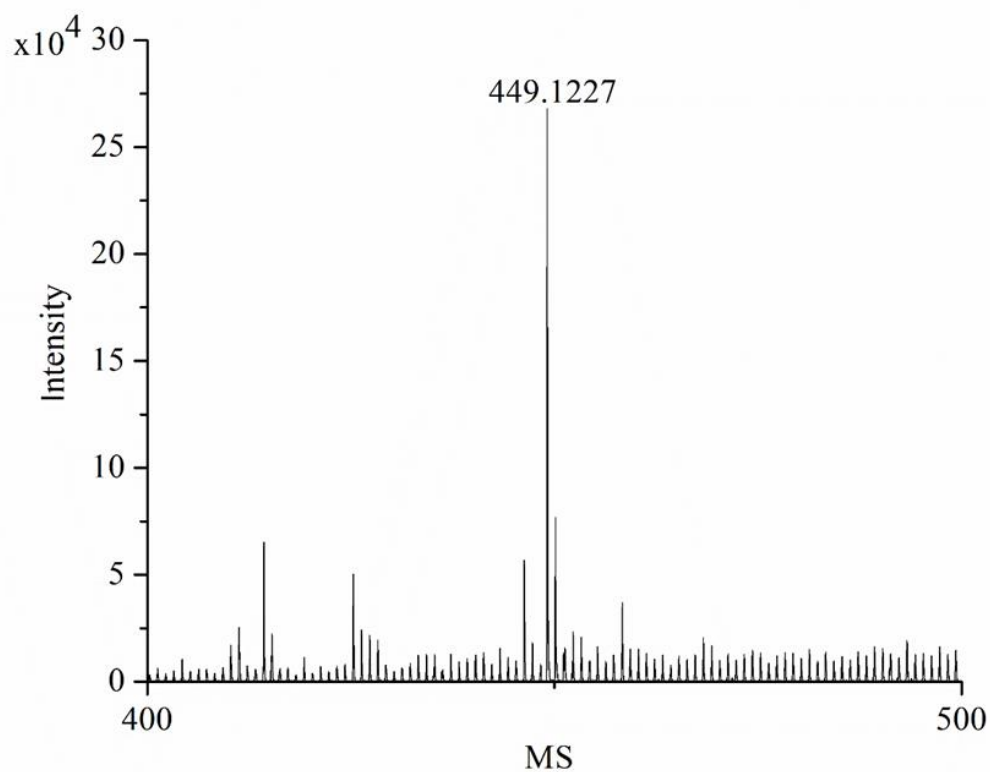

**Figure S2.** UPLC-QTOF-MS spectrum of compound **1**

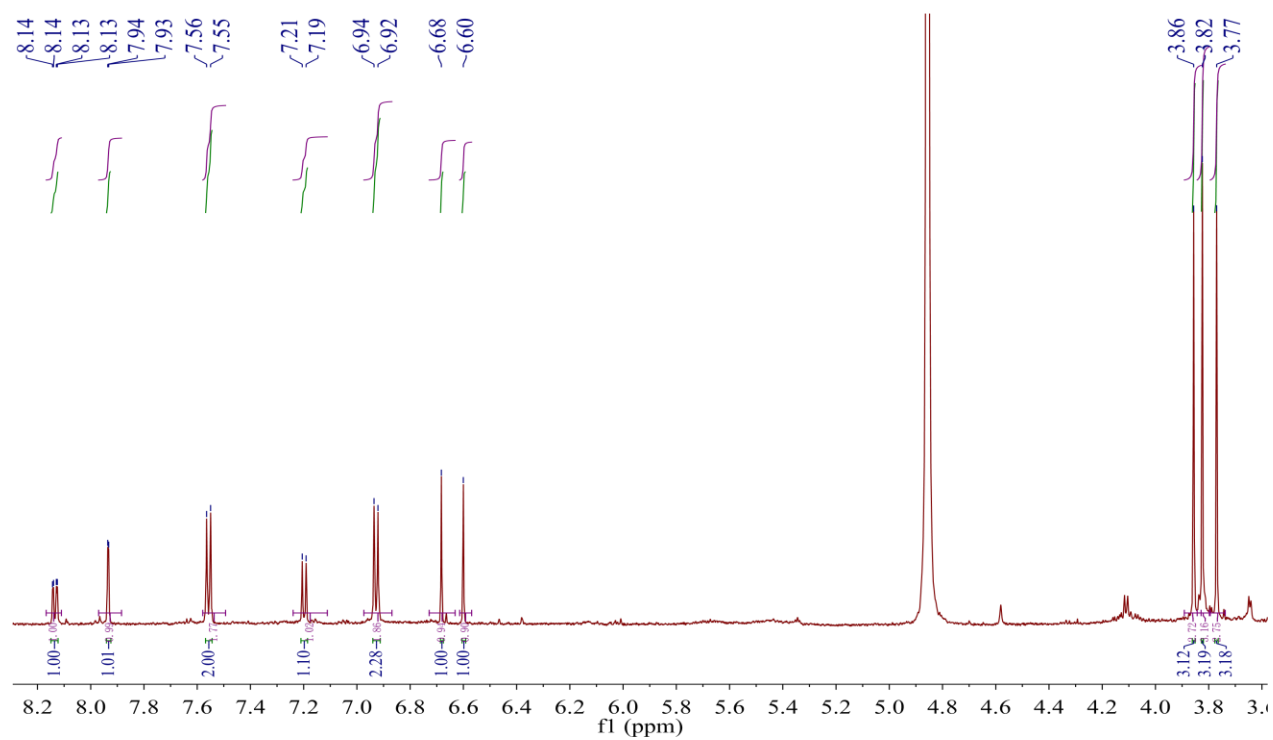

**Figure S3.** <sup>1</sup>H NMR (600 MHz) spectrum of compound **1** in Methanol-*d*<sub>4</sub>

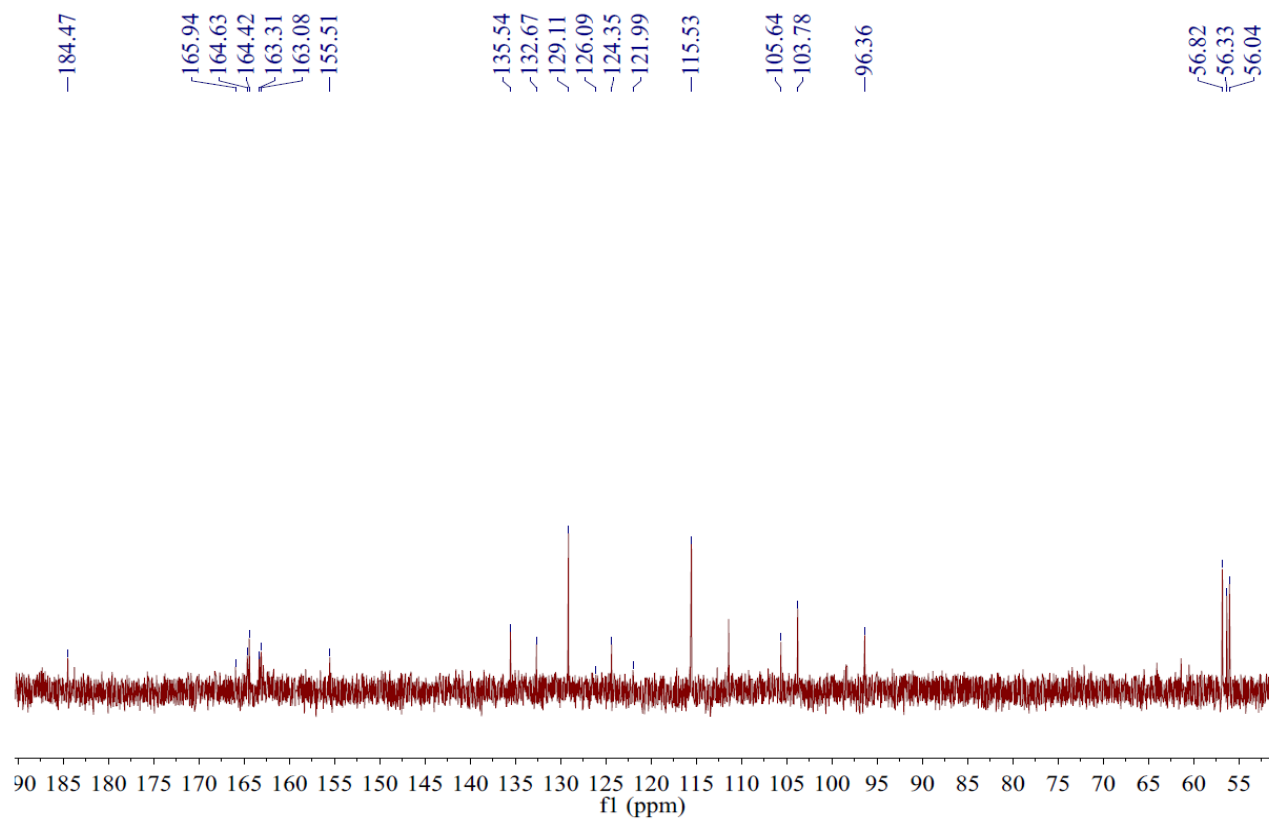

**Figure S4.**  $^{13}\text{C}$  NMR (150 MHz) spectrum of compound **1** in Methanol- $d_4$

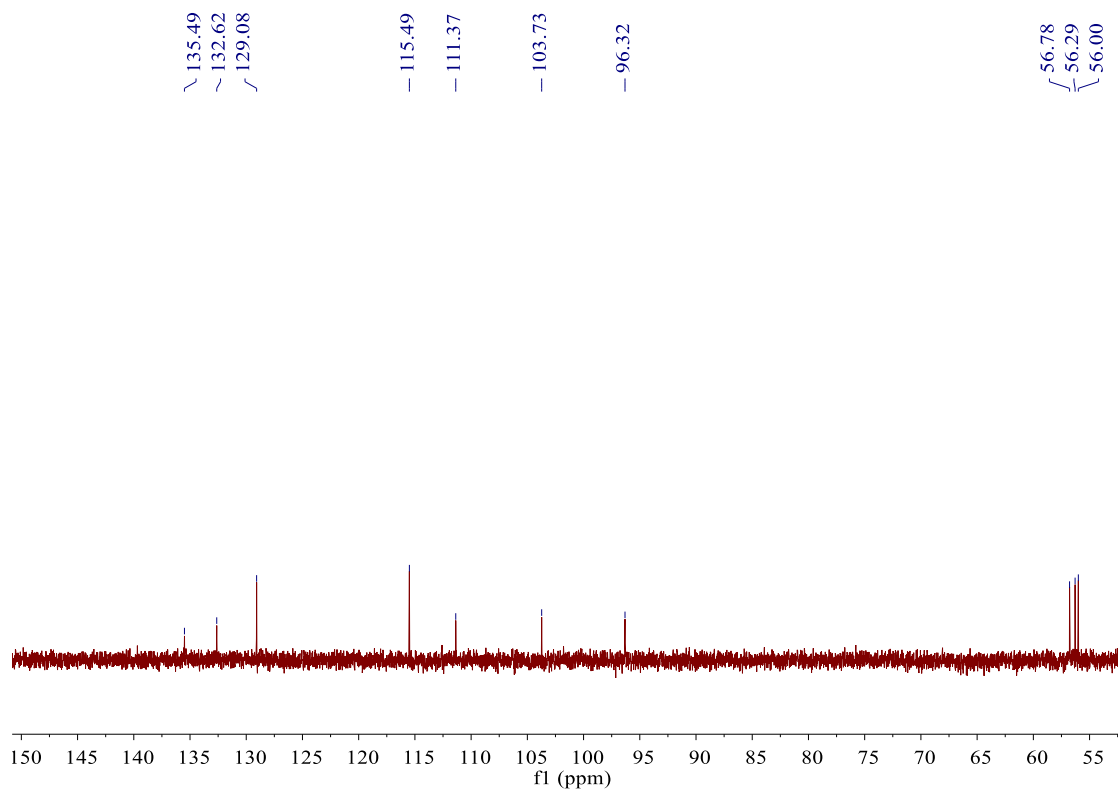

**Figure S5.** DEPT (150 MHz) spectrum of compound **1** in Methanol- $d_4$

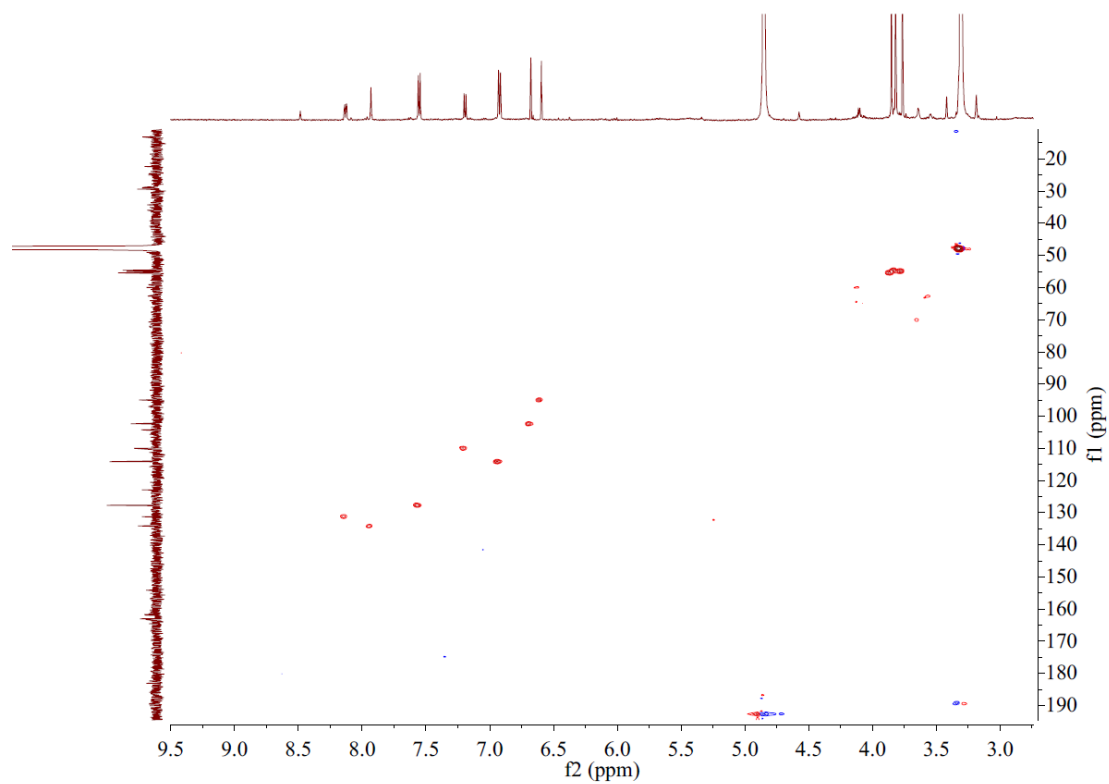

**Figure S6.** HSQC (600 MHz) spectrum of compound **1** in Methanol-*d*<sub>4</sub>

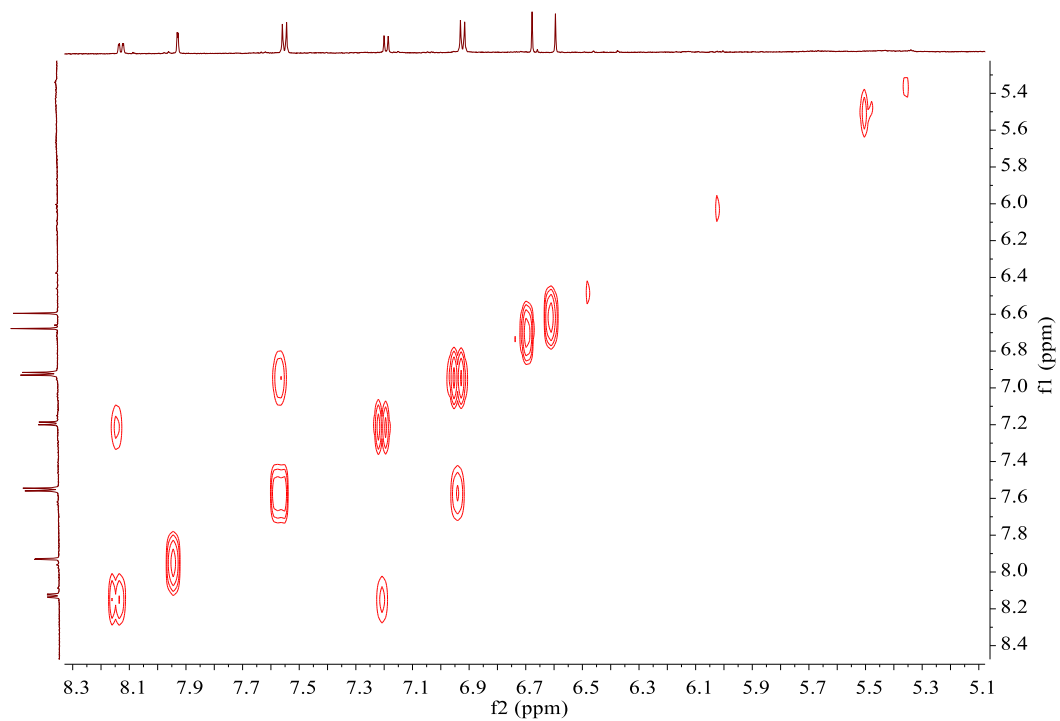

**Figure S7.** <sup>1</sup>H-<sup>1</sup>H COSY (600 MHz) spectrum of compound **1** in Methanol-*d*<sub>4</sub>

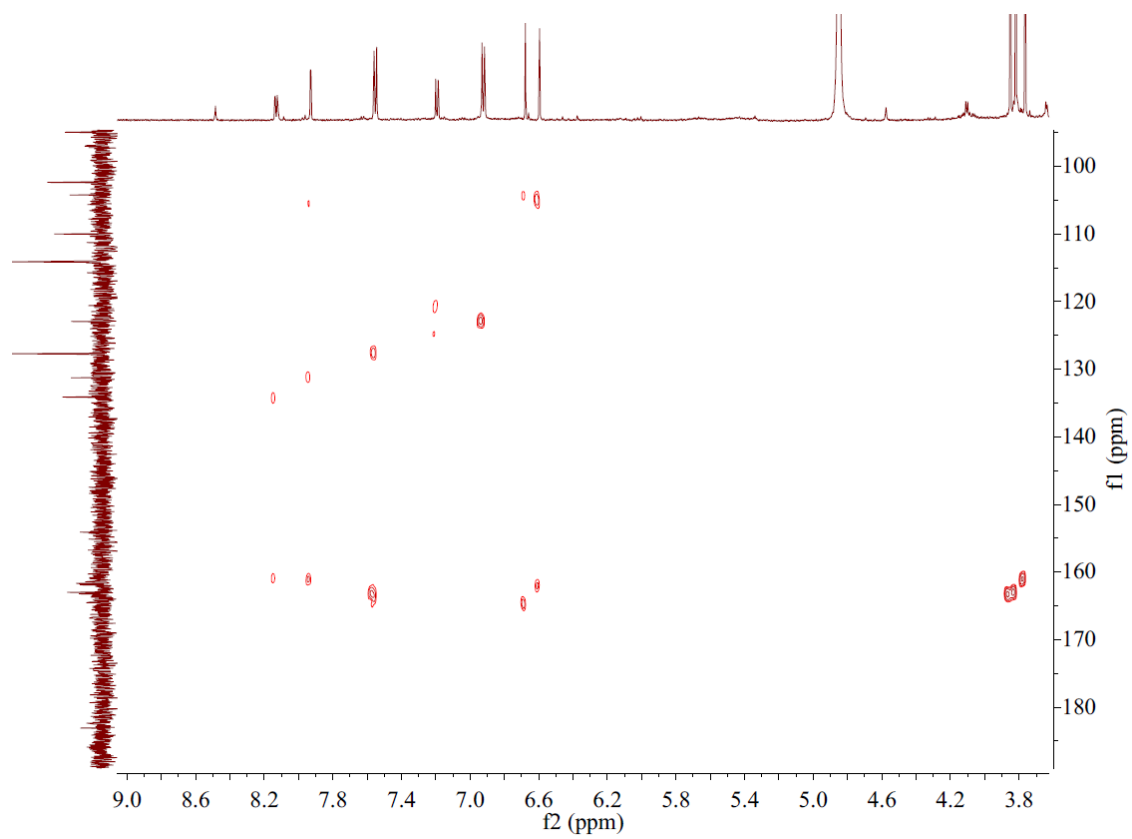

**Figure S8.** HMBC (600 MHz) spectrum of compound **1** in Methanol- $d_4$

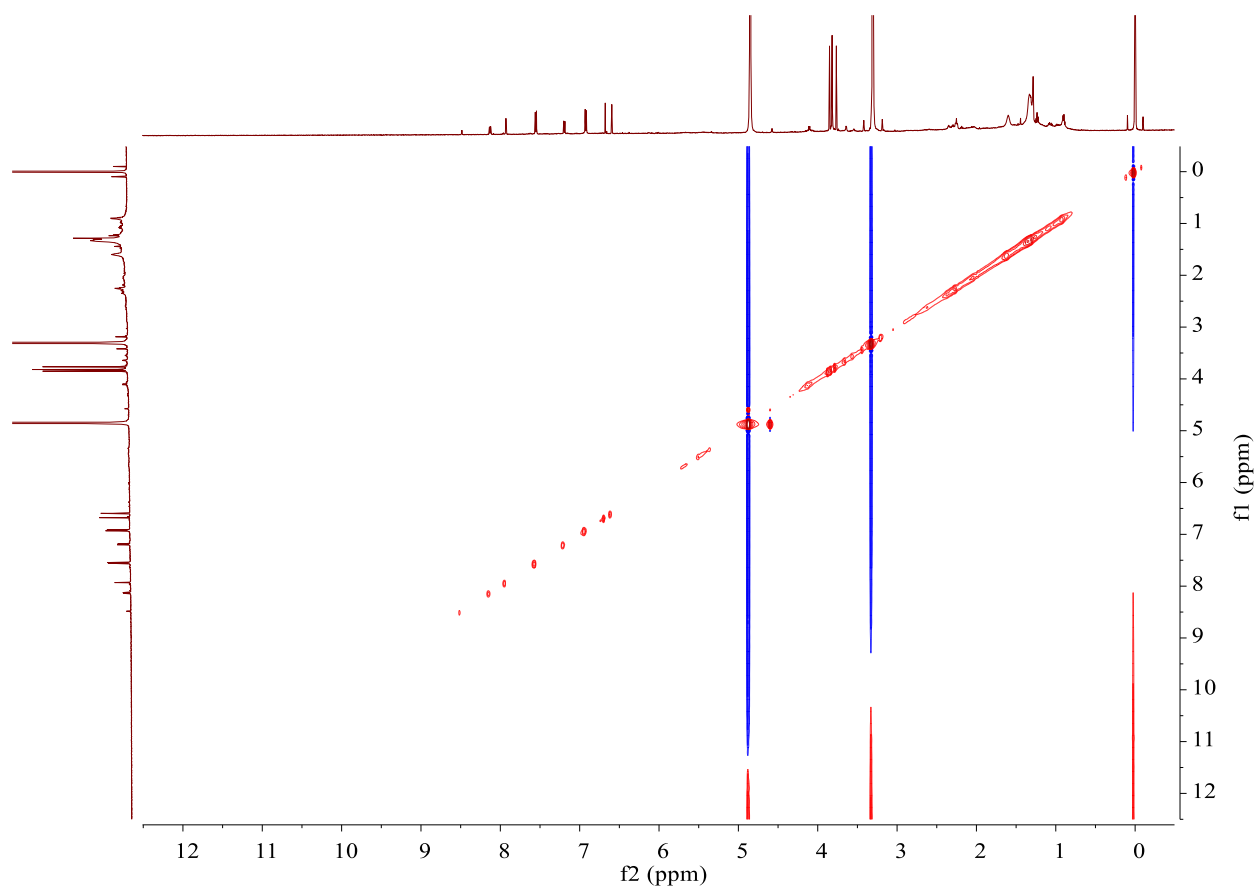

**Figure S9.** NOESY (600 MHz) spectrum of compound **1** in Methanol-*d*<sub>4</sub>

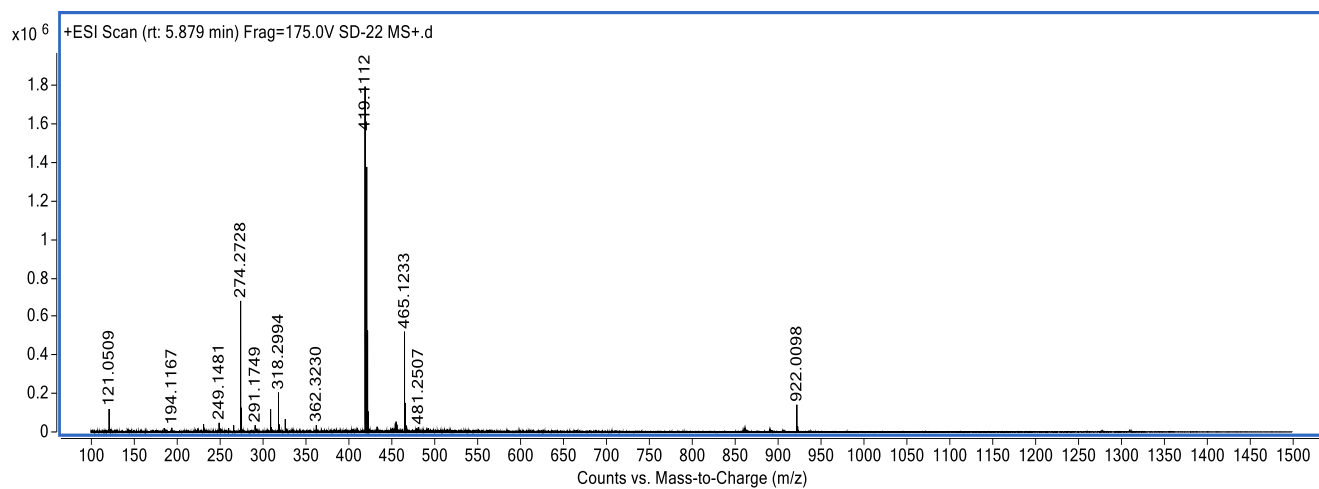

**Figure S10.** UPLC-QTOF-MS spectrum of compound **3**



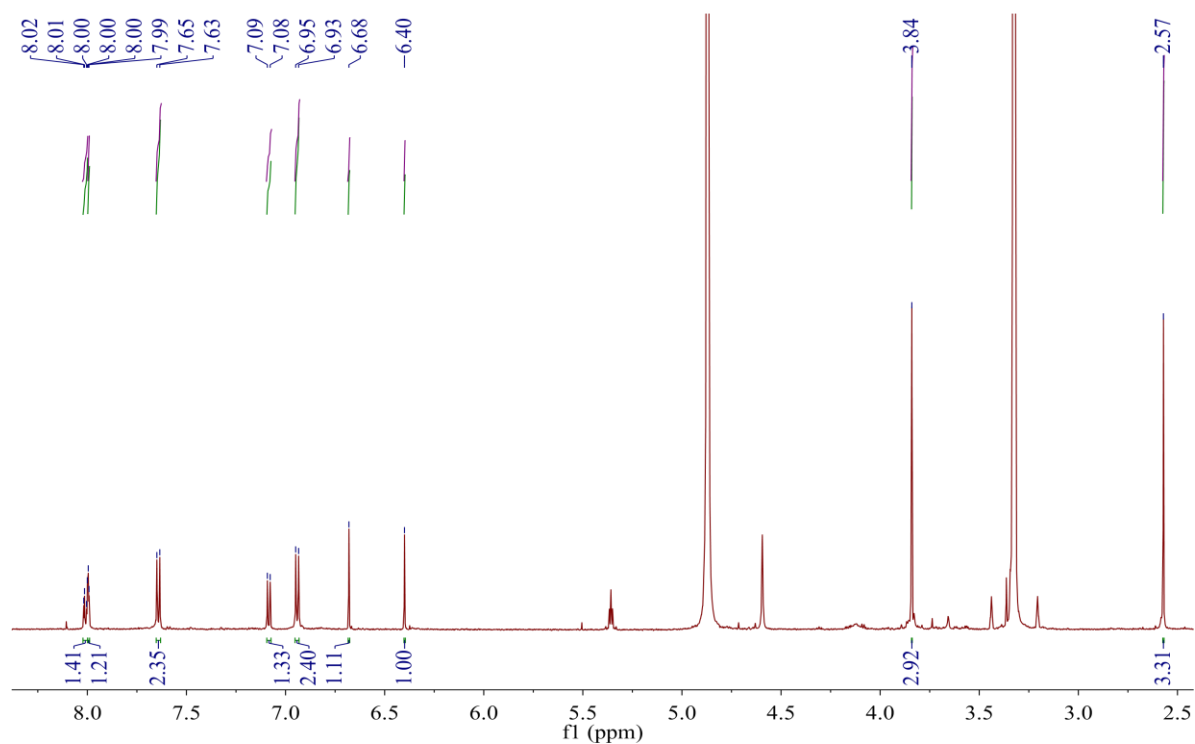

**Figure S11.**  $^1\text{H}$  NMR (600 MHz) spectrum of compound **3** in Methanol- $d_4$

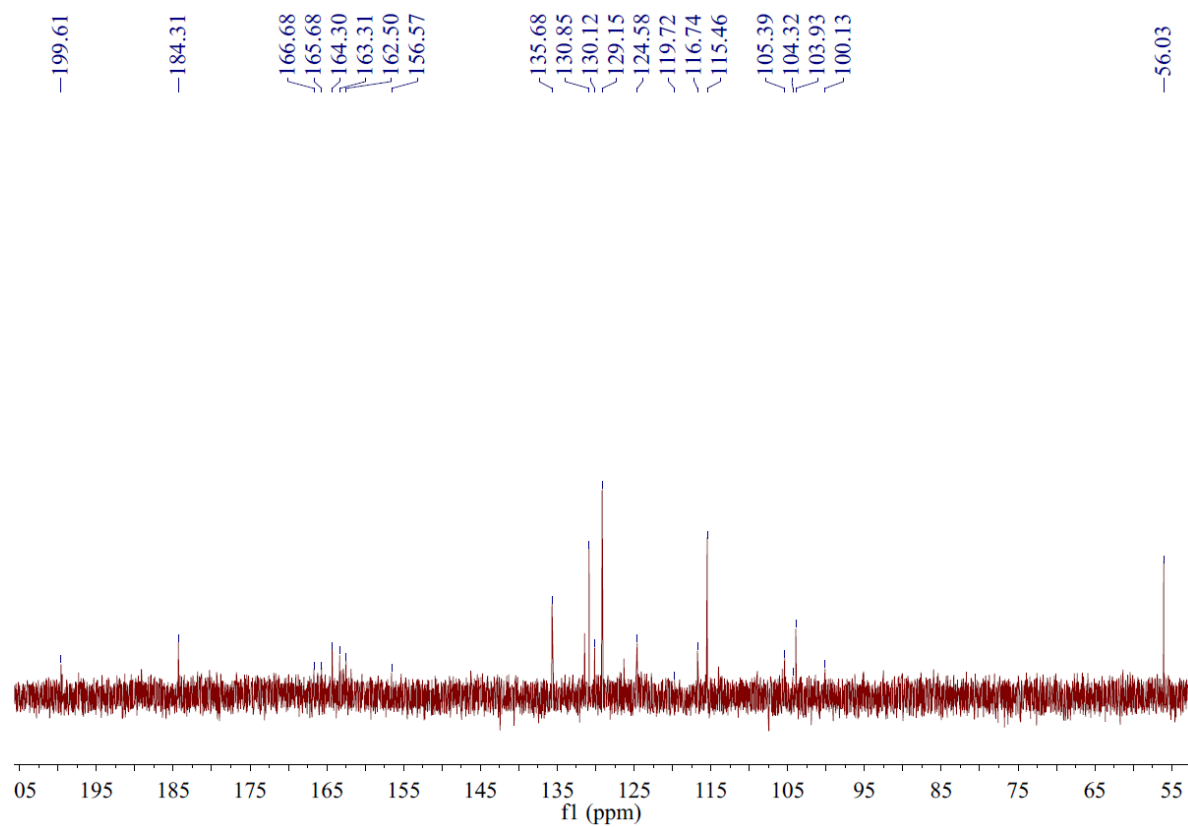

**Figure S12.**  $^{13}\text{C}$  NMR (150 MHz) spectrum of compound **3** in Methanol- $d_4$

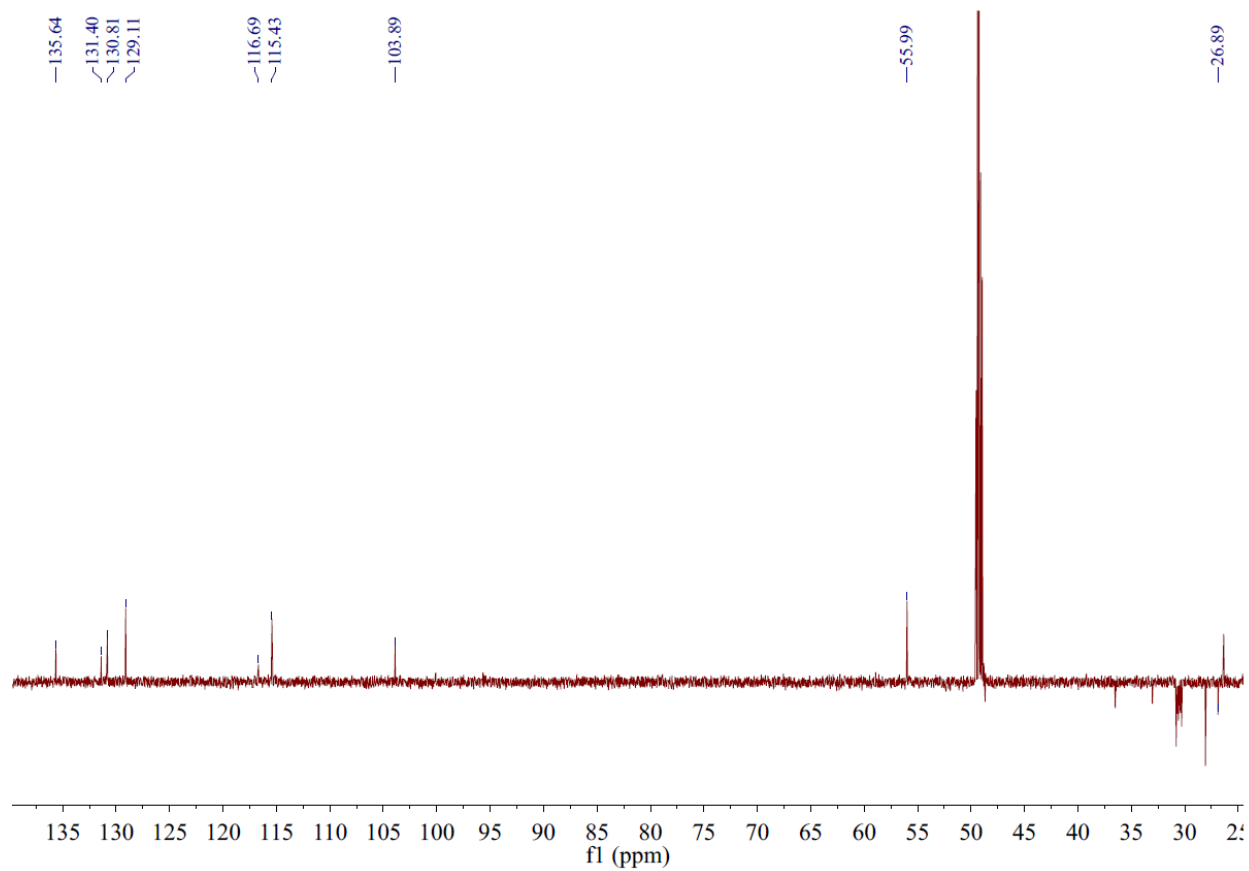

**Figure S13.** DEPT (150 MHz) spectrum of compound 3 in Methanol-*d*<sub>4</sub>

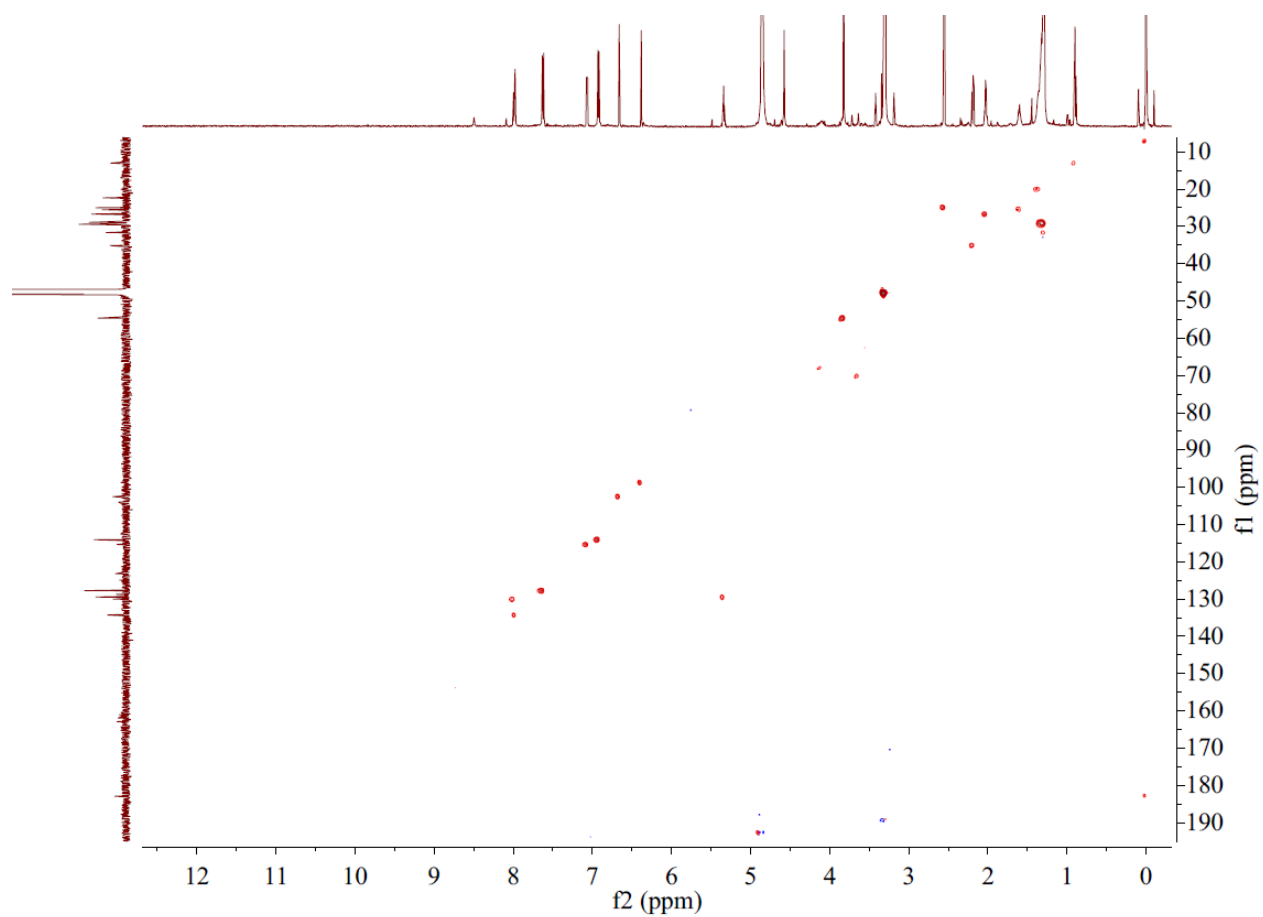

**Figure S14.** HSQC (600 MHz) spectrum of compound **3** in Methanol-*d*<sub>4</sub>

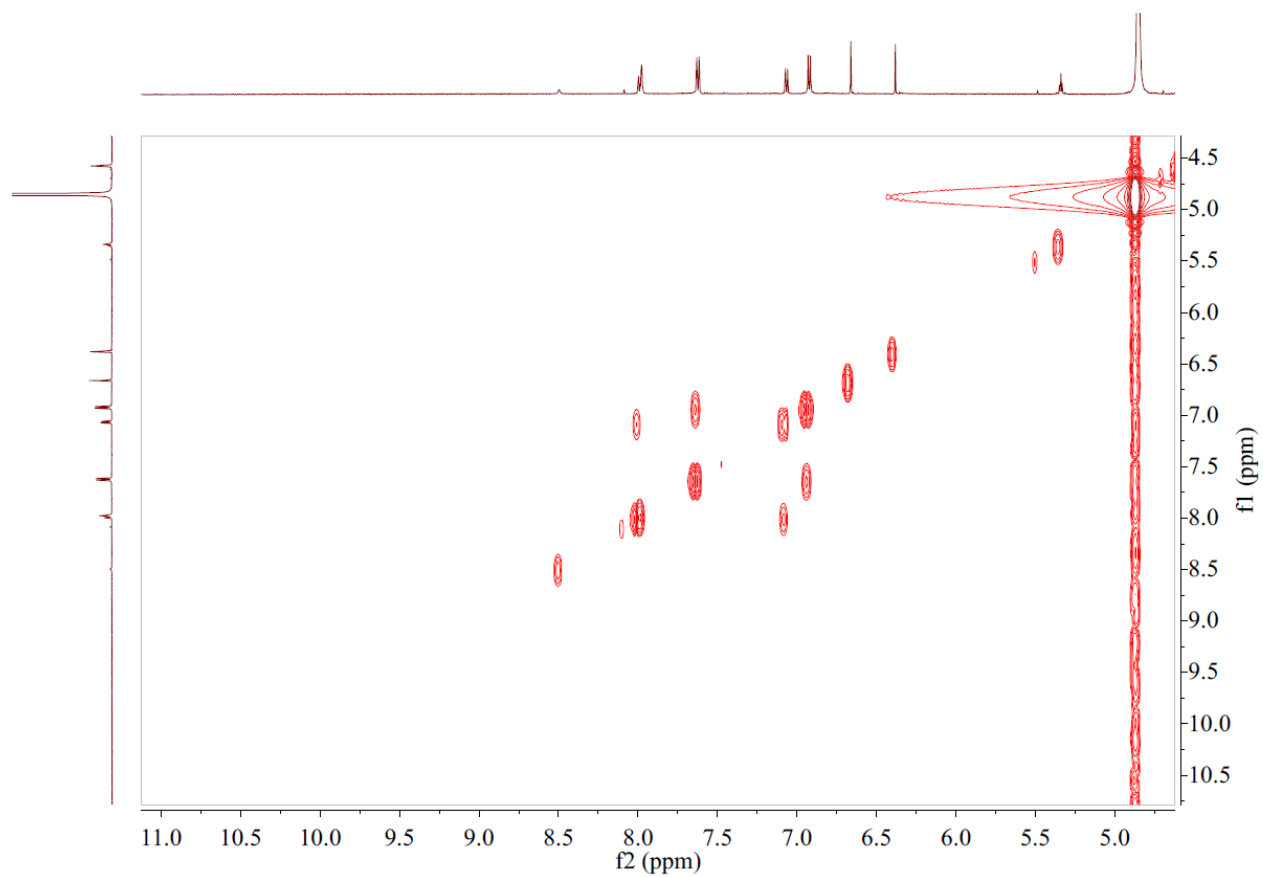

**Figure S15.**  $^1\text{H}$ - $^1\text{H}$  COSY (600 MHz) spectrum of compound **3** in Methanol- $d_4$

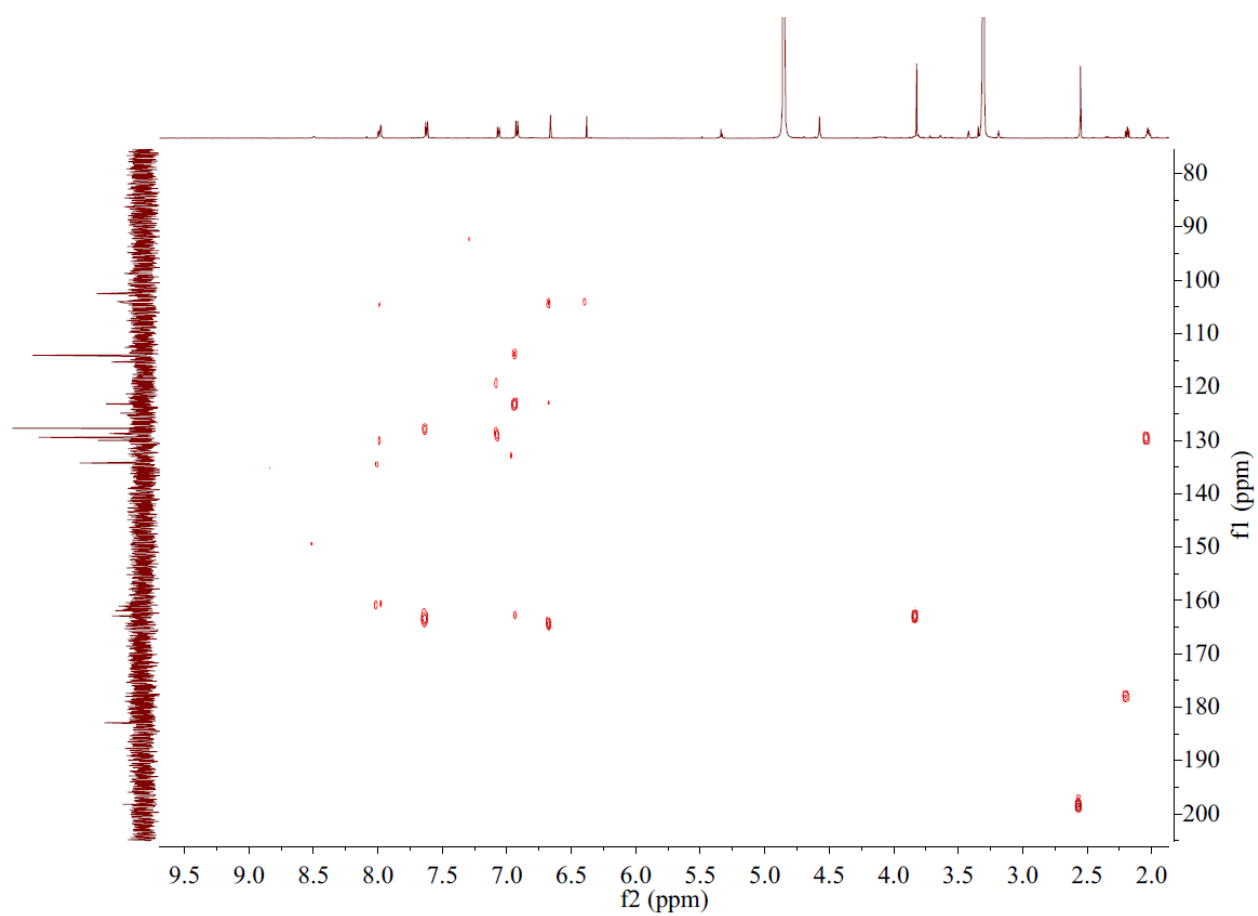

**Figure S16.** HMBC (600 MHz) spectrum of compound **3** in Methanol-*d*<sub>4</sub>

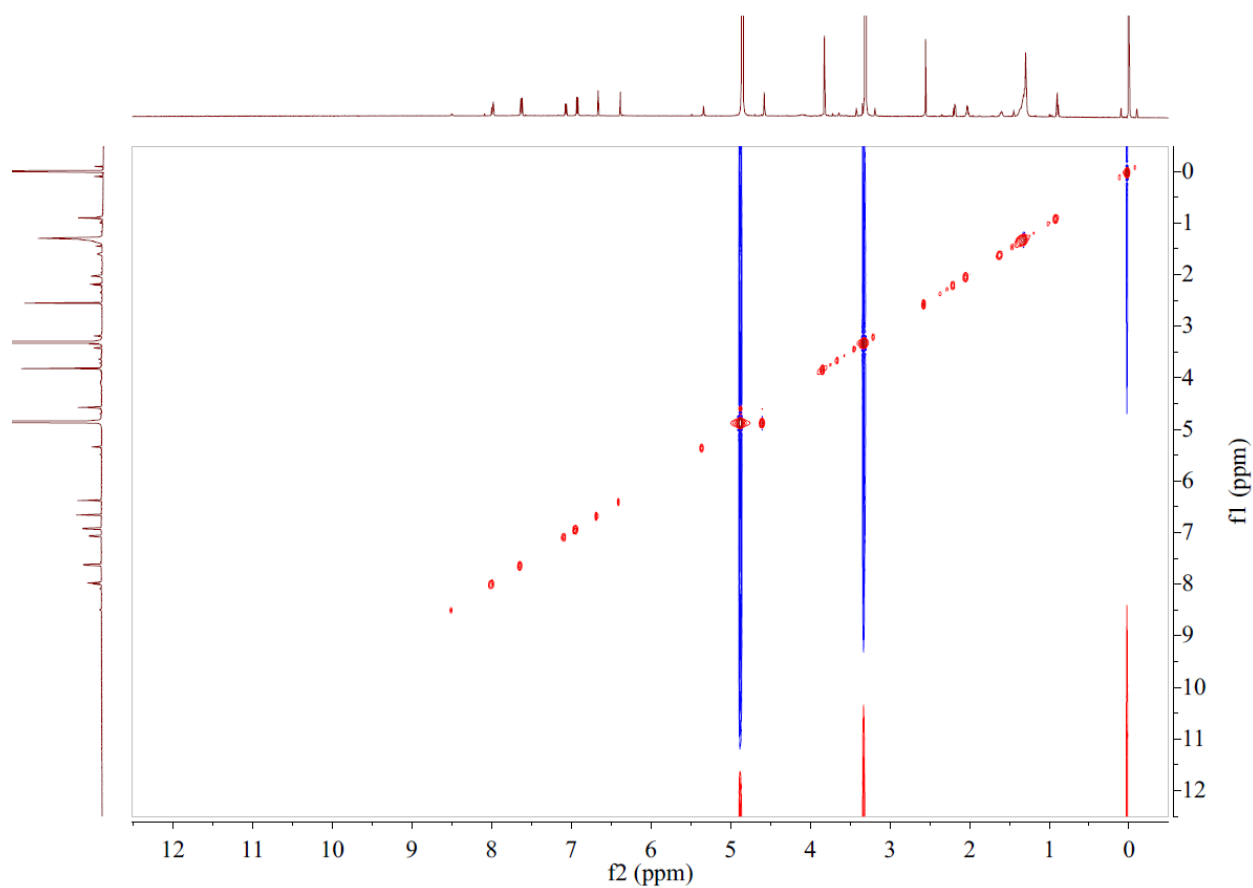

**Figure S17.** NOESY (600 MHz) spectrum of compound **3** in Methanol-*d*<sub>4</sub>
